# Supplementary material for: Automated bond valence sum analysis for crystallographic database quality assessment: a systematic study of rock salt oxides, halides, and chalcogenides
Source: Royal Society of Chemistry journal article supplement (doi:10.1039/d5dt03003j), 2026-01-01
Supplement: d5dt03003j1.pdf [file d5dt03003j1.pdf]

## Supplementary Information

**Figure S1. Distribution of validation metrics for 613 assessable rock salt structures.**

Percentage deviation from formal valence ( $|BVS\ deviation|$ , y-axis) versus absolute discrepancy factor ( $|d_1|$ , x-axis) for all cation sites analysed. Marker colours indicate structure-level validation status (green: validated, amber: borderline, red: failed); marker shapes indicate cation oxidation state (circles:  $M^{1+}$ , squares:  $M^{2+}$ , triangles:  $M^{3+}$ , plus symbols:  $M^{5+}$ ). Point size scales with Global Instability Index (GII), with larger markers indicating higher structural strain. Grey dashed lines mark the dual validation thresholds (horizontal: 10% deviation; vertical:  $|d_1| = 0.10$  v.u.); structures must satisfy both criteria simultaneously for automated validation. Subtle grey trend lines (dotted:  $M^{1+}$ , dashed:  $M^{2+}$ ) show the mathematical relationship between absolute and relative deviations for each valence state, demonstrating that the dual-threshold approach ensures consistent validation standards across different oxidation states. Each point represents a cation site from the Eir analysis; structures with mixed cation occupancy contribute multiple points. The clear separation between validated (lower-left), borderline (intermediate), and failed (upper-right) regions confirms that the combined criteria successfully partition structures according to validation reliability.

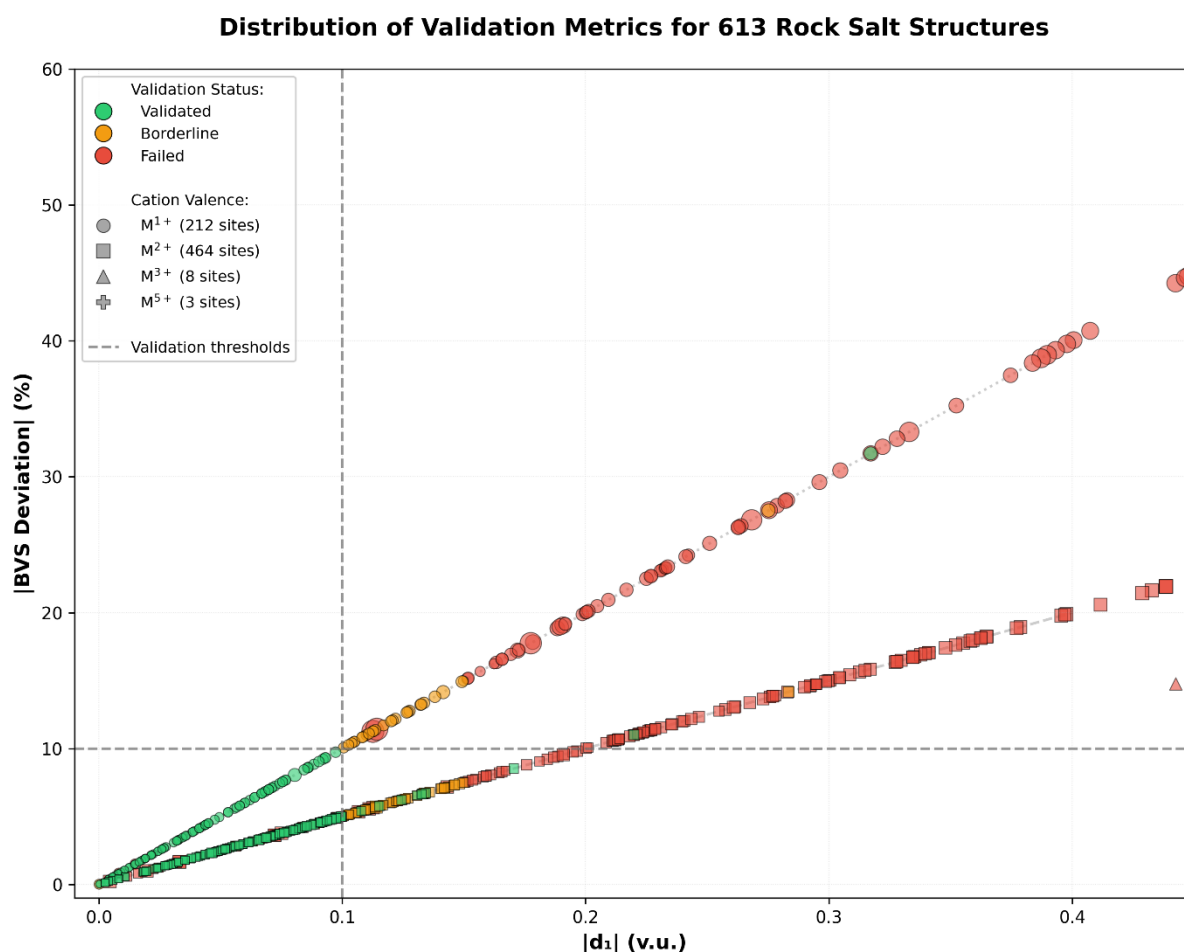

## SECTION S2: SUPPLEMENTARY DATA FILES

The following CSV files are provided as separate downloadable files:

Data File S1: All\_Assessable\_Structures.csv (613 structures)

Complete listing with validation status, measurement conditions, failure mode classifications. Enables full reproduction of manuscript statistics.

Data File S2: Excluded\_No\_Parameters.csv (154 structures)

Structures lacking BVS parameters. Identifies priority areas for future parameter development.

Data File S3: Type1\_Parameter\_Inadequacy.csv (107 structures)

Systematic parameter inadequacy - highest priority for revision. Includes all alkaline earth oxides with  $r > 1.0 \text{ \AA}$ .

Data File S4: Types3-5\_Methodological\_Limitations.csv (95 structures)

Structures inappropriate for conventional BVS analysis due to disorder effects.

Data File S5: Type6\_Database\_Quality.csv (12 structures)

Database quality issues identified by BVS screening. Includes complete references for verification.

Data File S6: Borderline\_Structures.csv (93 structures)

Intermediate confidence category that required manual review.

## DATA FILE S1: All\_Assessable\_Structures.csv

Complete listing of 613 rock salt structures assessed by automated bond valence sum analysis.

Columns:

- ICSD Code: Unique identifier from Inorganic Crystal Structure Database
- Formula: Normalised chemical formula (alphabetical element order)
- Chemical Formula: Full stoichiometric formula as reported
- Space Group:  $Fm\bar{3}m$  (all structures are rock salt type)
- Validation Status: Validated / Borderline / Failed
- Measurement Conditions: Ambient / High\_PT / Elevated
- Compound Class: Oxide / Halide / Sulphide / Other
- Year: Publication/measurement year
- Journal: Source journal (abbreviated)
- GII: Global Instability Index (structure-wide BVS metric)
- Failure Mode: Classification for failed structures (Type 1, Type 3-6, or blank)
- Disorder Type: pure / homovalent / heterovalent / mixed\_anion

Validation criteria: "Validated" (<10% deviation,  $|d1| < 0.10$  v.u.), "Borderline" (10-15% deviation, requires manual review), "Failed" (>15% deviation or methodological limitations).

Measurement conditions: "Ambient" ( $T < 350$  K,  $P < 0.5$  GPa), "High\_PT" (elevated pressure and/or temperature  $> 10$  GPa or  $> 1000$  K), "Elevated" ( $T > 350$  K at ambient pressure).

Usage: Enables complete reproduction of validation statistics in manuscript Tables 1-3. Researchers building computational datasets can filter by Validation Status and Measurement Conditions to select appropriate reference structures.

File size: ~165 KB, 613 rows (plus header)

## DATA FILE S2: Excluded\_No\_Parameters.csv

Rock salt structures excluded from BVS analysis due to incomplete parameter coverage in the Gagné & Hawthorne (2015) and Brown (2020) compilations.

Columns:

- ICSD Code: Unique identifier from ICSD
- Formula: Normalised chemical formula
- Chemical Formula: Full stoichiometric formula
- Space Group:  $Fm\bar{3}m$
- Compound Class: Oxide / Halide / Sulphide / Other
- Year: Publication/measurement year
- Journal: Source journal
- Elements Present: Comma-separated list of elements
- Missing Parameters: Description of parameter gap

Key statistics: 154 structures (20.1% of total dataset). Lanthanide Sulphides dominate exclusions (116 structures, 75.3%), followed by early transition metal oxides ( $Ti^{2+}$ ,  $Nb^{2+}$ ,  $Sc^{2+}$ ), silver halides ( $Ag^+-Br^-$ ,  $Ag^+-I^-$ ), and 4d metal Sulphides.

Usage: Identifies priority areas for future bond valence parameter development. These structures represent legitimate crystallographic determinations but cannot be assessed via conventional BVS until parameter compilations are extended.

File size: ~35 KB, 154 rows

### DATA FILE S3: Type1\_Parameter\_Inadequacy.csv

Systematic parameter inadequacy failures - pure phases with  $\geq 3$  independent measurements showing reproducible validation failures.

Columns:

- Formula: Chemical formula
- ICSD Code: Unique structure identifier
- n (total): Number of independent measurements for this formula
- n (failed): Number that failed validation
- Year: Measurement year
- Mean Deviation (%): Average BVS deviation from formal valence
- GII: Global Instability Index
- Compound Class: Oxide / Sulphide / etc.

Key compounds with 100% failure rates:

- CdO: 17/17 structures
- CaO: 15/15 structures
- Nd<sub>1</sub>S<sub>1</sub>: 13/13 structures
- EuO: 12/12 structures
- SrO: 11/11 structures
- VO: 9/9 structures
- BaO: 5/5 structures

Diagnostic criteria: Reproducible failures across multiple laboratories and decades with exceptionally low inter-structure variance (<5% relative to mean deviation) distinguish genuine parameter inadequacy from experimental scatter.

Usage: Highest priority targets for bond valence parameter revision. Researchers using these compounds should note that current  $M^{2+}-O^{2-}$  and  $Ln^{2+}-S^{2-}$  parameters exhibit systematic inadequacies for large cations ( $r > 1.0 \text{ \AA}$ ).

File size: ~15 KB, 107 rows

#### DATA FILE S4: Types3-5\_Methodological\_Limitations.csv

Structures where diffraction-averaged geometries prove fundamentally inappropriate for BVS analysis regardless of parameter quality.

Columns:

- Type: Classification (3, 4, or 5)
- Formula: Chemical formula
- ICSD Code: Unique identifier
- Year: Measurement year
- Mean Deviation (%): BVS deviation
- GII: Global Instability Index
- Details: Type-specific information ( $\Delta V$  for heterovalent, etc.)

Type classifications:

- Type 3 (14 structures): Vacancy disorder in nonstoichiometric phases
- Type 4 (11 structures): Heterovalent disorder,  $\Delta V \geq 2$  (Bosi-type artifacts)
- Type 5 (45 structures): Homovalent and mixed anion disorder

Type 4 structures ( $\text{LiFeO}_2$ ,  $\text{LiCoO}_2$ ,  $\text{Li}_3\text{TaO}_4$ ,  $\text{Li}_3\text{NbO}_4$ ) exhibit bidirectional deviations characteristic of mathematical artifacts from diffraction-averaged bond lengths. Type 5 includes compositionally disordered solid solutions ( $\text{Na}_{1-x}\text{K}_x\text{Cl}$ ,  $\text{Ni}_{1-x}\text{Zn}_x\text{O}$ ) where deviations scale with size mismatch.

Usage: These structures should be flagged in databases as requiring complementary characterization (spectroscopy for Type 4, occupancy-weighted BVS for Type 3) rather than conventional validation. Inappropriate as computational reference structures for bond-length-sensitive applications.

File size: ~13 KB, 95 rows

#### DATA FILE S5: Type6\_Database\_Quality.csv

Database quality issues identified through BVS screening - structures with metadata inadequacies or measurement contexts rendering them inappropriate as bulk reference structures.

Columns:

- Type: Subclassification (6A / 6B / 6C / 6D)
- ICSD Code: Unique identifier
- Formula: Chemical formula
- Year: Measurement/publication year
- Deviation (%): BVS deviation magnitude
- Issue: Description of quality concern
- Reference: Source publication (abbreviated)

Type classifications:

- Type 6A (6 structures): Pre-modern techniques (1920-1970), film-based diffraction
- Type 6B (1 structure): Thin film determination (substrate effects, metastability)
- Type 6C (4 structures): Multi-phase Rietveld refinement contamination
- Type 6D (1 structure): Miscategorized measurement conditions (high-pressure synthesis)

Notable case: ICSD 22171 ( $\text{K}_{0.3}\text{Rb}_{0.7}\text{Cl}$ ) includes metadata stating "composition has largest deviation from Vegard's Law", indicating structure was deposited due to anomalous behavior.

Usage: Demonstrates that BVS screening identifies fitness-for-purpose issues. These structures are appropriate for phase diagram compilation but unsuitable for applications requiring high-precision bulk references (machine learning training, computational benchmarking). Complete references enable verification of synthesis contexts.

File size: ~4 KB, 12 rows

DATA FILE S6: Borderline\_Structures.csv

Structures requiring manual review to distinguish parameter inadequacy from expected geometric effects.

Columns:

- ICSD Code: Unique identifier
- Formula: Chemical formula
- Chemical Formula: Full stoichiometric formula
- Space Group:  $Fm\bar{3}m$
- Compound Class: Oxide / Halide / Sulphide
- Year: Measurement year
- Mean Deviation (%): BVS deviation (10-15% range)
- Mean  $|d1|$  (v.u.): Absolute discrepancy factor
- GII: Global Instability Index
- Disorder Type: pure / homovalent / mixed\_anion
- Review Reason: Classification rationale

Criteria: Deviations 10-15% or modest absolute discrepancy  $0.10 < |d1| < 0.15$  v.u., falling between automated acceptance and definitive failure.

Distribution: Predominantly oxides (64 structures, 68.8%); chlorides (25 structures, 26.9%), sulphides (3 structures, 3.2%), fluorides (1 structure, 1.1%)

Manual review workflow:

1. Verify space group and coordination number assignments
2. Check source publication for synthesis anomalies or non-ambient conditions
3. Compare to related compounds in chemical series
4. For homovalent solid solutions, verify deviation scales with composition

Usage: Intermediate confidence category where automated tools flag potential issues but chemical expertise required for classification. Researchers should consult source publications before using these structures as computational references.

File size: ~14 KB, 93 rows

**TOTAL DATA ACCOUNTING**



|                                          |             |
|------------------------------------------|-------------|
| Assessable structures (Data File S1):    | 613         |
| └ Validated:                             | 286 (46.7%) |
| └ Borderline (Data File S6):             | 93 (15.2%)  |
| └ Failed - Type 1 (Data File S3):        | 107 (17.5%) |
| └ Failed - Types 3-5 (Data File S4):     | 95 (15.5%)  |
| └ Failed - Type 6 (Data File S5):        | 12 (2.0%)   |
| └ Other failures (n<3, unclassified):    | 20 (3.3%)   |
| Excluded - no parameters (Data File S2): | 154         |
| <hr/>                                    |             |
| TOTAL UNIQUE STRUCTURES:                 | 766         |
| TOTAL MEASUREMENTS (incl. replicates):   | 841         |

NOTE: Data Files S3, S4, and S5 contain 9 overlapping structures (6 appearing in both S3 and S5, 3 in both S4 and S5). The sum of individual file counts ( $107 + 95 + 12 = 214$ ) therefore exceeds the unique structure count (205) by 9. Overlapping structures represent cases exhibiting multiple failure modes simultaneously.

## FILE FORMAT NOTES

All files are provided as comma-separated values (CSV) with UTF-8 encoding.

Import into Python:

```
import pandas as pd  
df = pd.read_csv('All_Assessable_Structures.csv')
```

Import into R:

```
df <- read.csv('All_Assessable_Structures.csv')
```

Import into Excel:

Data → Get External Data → From Text/CSV → Select file

Some ICSD codes may display in scientific notation in Excel. To fix:

Select column → Format Cells → Number → 0 decimal places

Missing values are represented as blank cells or "Unknown" for text fields.
